# Supplementary material for: Resistin Contribution to Cardiovascular Risk in Chronic Kidney Disease Male Patients
Source: MDPI journal article supplement (doi:10.3390/cells12070999), 2023-03-24
Supplement: s1 [file s1]

Supplementary file

**Scenario 1. All patients with missing data on smoking status are coded as non-smokers**

Table S1. Scenario 1 version of the Table 2 from the main body of the manuscript.

| Cardiovascular risk | Study group<br>n=99 |                  | Control group<br>n=43 |                                | p-value |
|---------------------|---------------------|------------------|-----------------------|--------------------------------|---------|
|                     | n                   | Median (IQR)     | n                     | Median (IQR)                   |         |
| Very high-risk      | 49                  | 52.7 (44.0-75.5) | 5                     | 45.8 (32.1-73.2)               | 0.335   |
| High-risk           | 51                  | 43.6 (30.2-58.0) | 21                    | 37.1 (27.1-61.0)               | 0.545   |
| Moderate-risk       | -                   | -                | 13                    | 36.4 (29.9-52.6)               | -       |
| Low-risk            | -                   | -                | 3                     | 22.4 (16.7-26.1)               | -       |
|                     |                     | <b>p=0.003</b>   |                       | <b>p<sub>trend</sub>=0.102</b> |         |

Residual analysis for CKD patients: significant association between resistin residuals and PAI-1

Table S2. Scenario 1 version of the Table 3 from the main body of the manuscript.

| Variable                | $\beta$ coefficient | 95% CI for $\beta$ | p-value      |
|-------------------------|---------------------|--------------------|--------------|
| CV risk                 |                     |                    |              |
| very high               | 40.63               | 14.03;67.23        | <b>0.003</b> |
| high                    | Ref.                | -                  | -            |
| PAI-1                   | 0.26                | 0.07;0.46          | <b>0.009</b> |
| PAI-1*very high CV risk | -0.26               | -0.51;-0.01        | <b>0.039</b> |
| PAI-1*high CV risk      | Ref.                | -                  | -            |

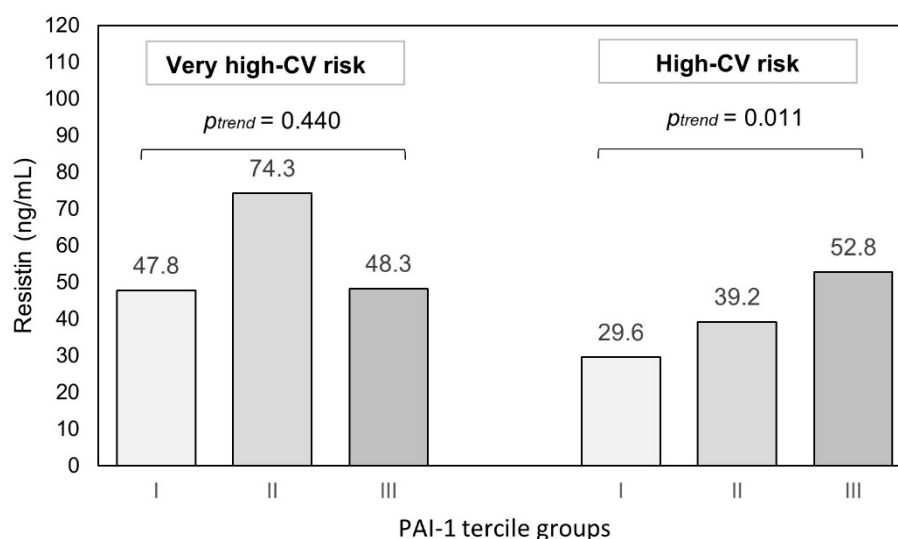

Figure S1. Scenario 1 version of the Figure 1 from the main body of the manuscript.

**Scenario 2. All patients with missing data on smoking status are coded as smokers**

Table S3. Scenario 2 version of the Table 2 from the main body of the manuscript.

| Cardiovascular risk | Study group<br>n=99 |                  | Control group<br>n=43 |                           | p-value |
|---------------------|---------------------|------------------|-----------------------|---------------------------|---------|
|                     | n                   | Median (IQR)     | n                     | Median (IQR)              |         |
| Very high-risk      | 82                  | 50.5 (36.2-71.5) | 8                     | 39.5 (29.6-67.3)          | 0.263   |
| High-risk           | 17                  | 44.7 (28.0-53.4) | 18                    | 39.6 (28.0-60.8)          | 0.935   |
| Moderate-risk       | -                   | -                | 13                    | 36.4 (29.9-52.6)          | -       |
| Low-risk            | -                   | -                | 3                     | 22.4 (16.7-26.1)          | -       |
|                     |                     | p=0.073          |                       | p <sub>trend</sub> =0.152 |         |

Residual analysis for CKD patients: significant association between resistin residuals and TNF-alpha and PAI-1 (at the border of significance)

Table S4. Scenario 2 version of the Table 3 from the main body of the manuscript.

| Variable                    | $\beta$ coefficient | 95% CI for $\beta$ | p-value |
|-----------------------------|---------------------|--------------------|---------|
| CV risk                     |                     |                    |         |
| very high                   | 35.73               | -14.32;85.79       | 0.160   |
| high                        | Ref.                | -                  | -       |
| TNF-alpha                   | -0.85               | -7.48;5.78         | 0.800   |
| TNF-alpha*very high CV risk | 1.83                | -4.87;8.54         | 0.588   |
| TNF-alpha*high CV risk      | Ref.                | -                  | -       |
| PAI-1                       | 0.38                | -0.003;0.76        | 0.052   |
| PAI-1*very high CV risk     | -0.33               | -0.73;0.07         | 0.107   |
| PAI-1*high CV risk          | Ref.                | -                  | -       |

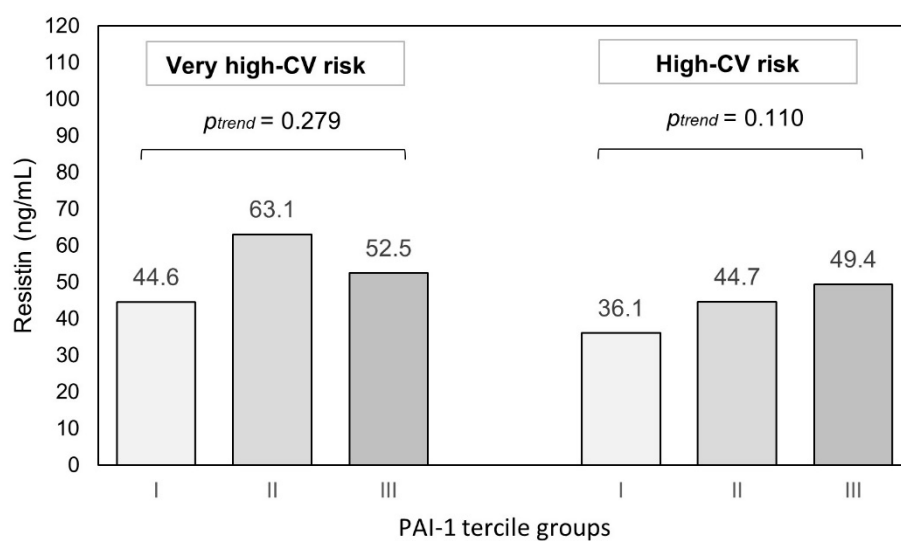

Figure S2. Scenario 2 version of the Figure 1 from the main body of the manuscript.
